# Supplementary material
Source: Springer Nature journal article supplement (https://www.springermedizin.de/resource/supplementary/12885_2012_3235_MOESM1_ESM.pdf/9463196)
Supplement: MOESM1 [file 9463196]

Patients with up to 5 metastatic lesions meeting inclusion criteria

Informed consent obtained

RANDOMIZATION

**(1:2 ratio of randomization to Arm 1 vs. Arm 2)**

**ARM 1: STANDARD OF CARE**

Palliative radiation therapy if indicated  
Further chemotherapy at discretion of medical oncologist

FOLLOW-UP

Clinical follow-up every 3 months with quality of life measurement.

CT and bone scan at 3 and 6 months, then every 6 months until progression

**ARM 2: SABR**

SABR to all sites of known disease  
Further chemotherapy at discretion of medical oncologist

FOLLOW-UP

Clinical follow-up every 3 months with quality of life measurement.

CT and Bone Scan at 3 and 6 months, then every 6 months for SABR salvage of new lesions
